# Supplementary material
Source: PubMed Central journal article supplement (PMC5360469)
Supplement: NIHMS847215-supplement-1.pdf [file NIHMS847215-supplement-1.pdf]

## Supplemental figure 1

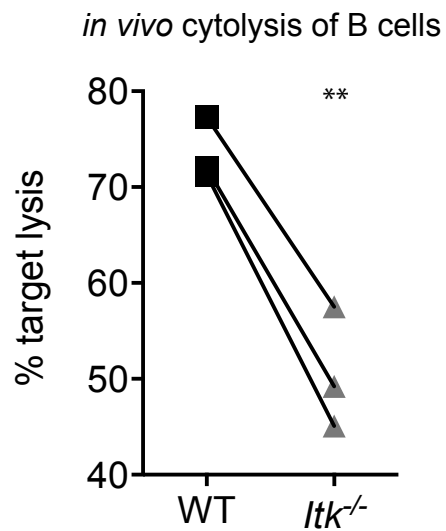

Supplemental figure 1: *In vivo* cytotoxicity of 1  $\mu$ M OVA peptide-pulsed LPS-activated B cell targets. Graph shows percent target lysis, where each line represents paired mice from three individual experiments. \*\*P<0.01 calculated by paired sample t-tests.

## Supplemental figure 2

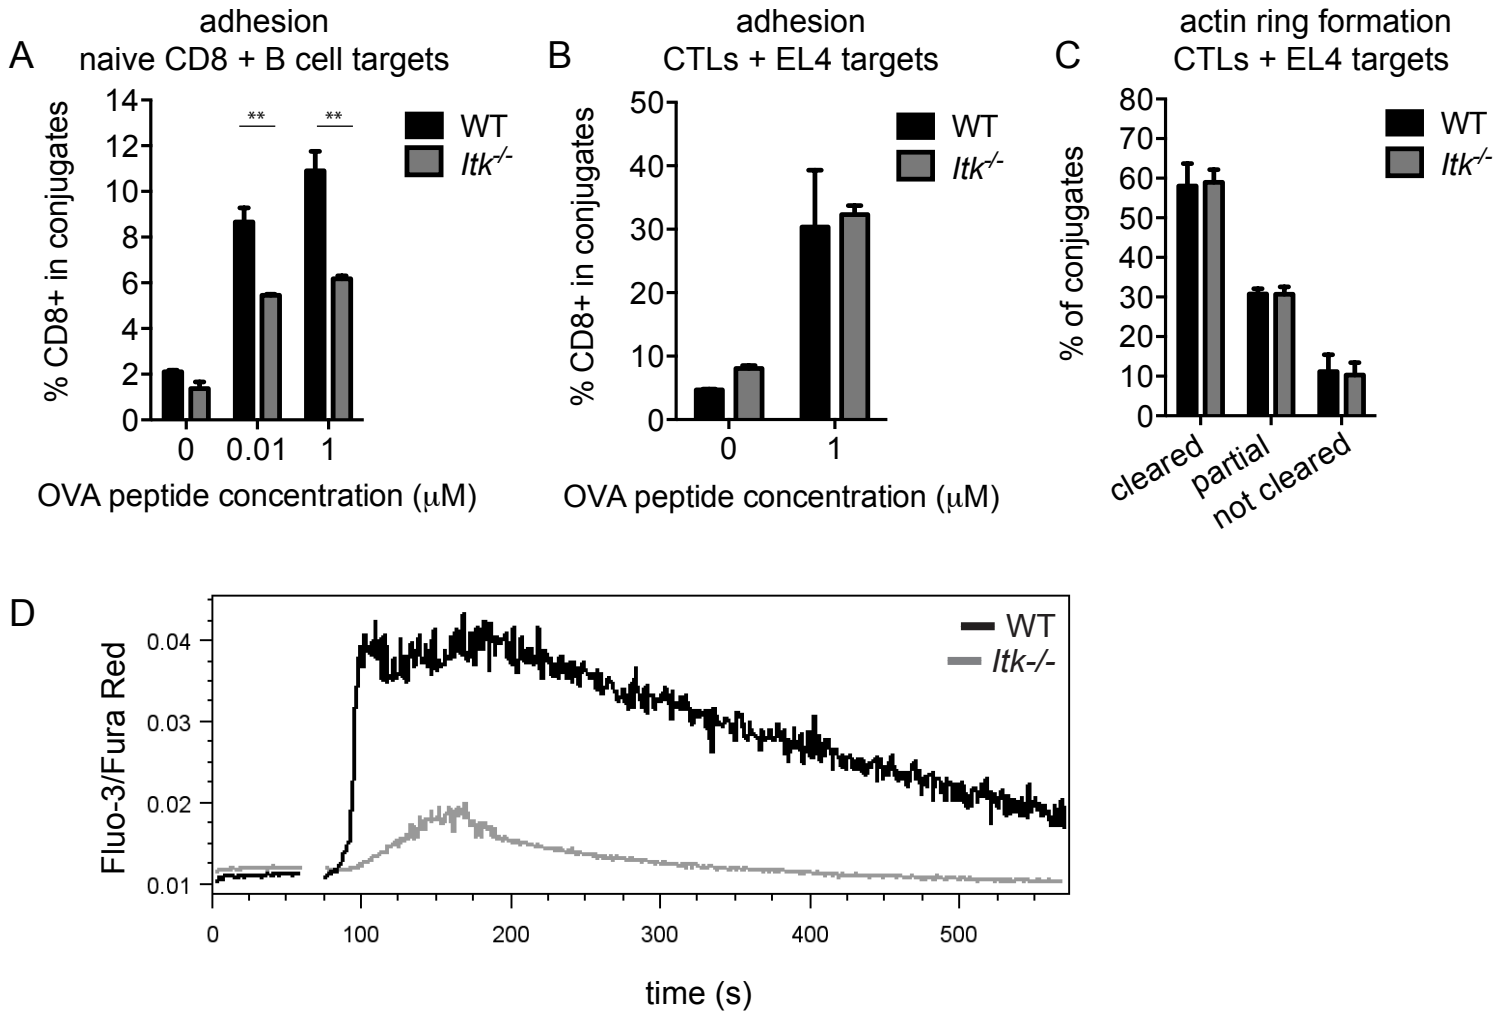

Supplemental figure 2: Adhesion, actin organization, and calcium flux in ITK-deficient and WT CTLs. (A) Adhesion of naïve CD8<sup>+</sup> cells after 20 minutes conjugation of *ex vivo* WT (black) or *Itk*<sup>-/-</sup> (grey) CD8<sup>+</sup> T cells to LPS-activated WT B cells pulsed with OVA peptide at indicated concentrations, or not pulsed as a control. Graph represents mean of triplicates  $\pm$  SD of CD8<sup>+</sup> target<sup>+</sup> cells in total CD8<sup>+</sup> events, and is representative of two independent experiments. \*\* $P < 0.01$  calculated by Student's T-test. (B) Adhesion of previously activated WT (black) or *Itk*<sup>-/-</sup> (grey) CTLs after 20 minutes conjugation to EL4 targets pulsed with 1  $\mu\text{M}$  OVA or not pulsed as a control. Graph represents mean  $\pm$  SD of CD8<sup>+</sup> target<sup>+</sup> cells in total CD8<sup>+</sup> events, and is representative of more than five experiments. (C) Quantification of actin ring localization at the immunological synapse between WT (black) and *Itk*<sup>-/-</sup> (grey) CTLs and EL4 targets pulsed with 1  $\mu\text{M}$  OVA peptide. WT (total  $n=185$ ) and *Itk*<sup>-/-</sup> (total  $n=194$ ). Bars represent mean  $\pm$  SEM from more than three independent experiments. (D) Intracellular Ca<sup>2+</sup> flux in WT (black) or *Itk*<sup>-/-</sup> (grey) following 5  $\mu\text{g}/\text{mL}$  anti-CD3 crosslinking, plotted as the ratio of Fluo-3 (FL-1)/Fura Red (FL-3) over time. Histograms are representative of two independent experiments.

Supplemental figure 3

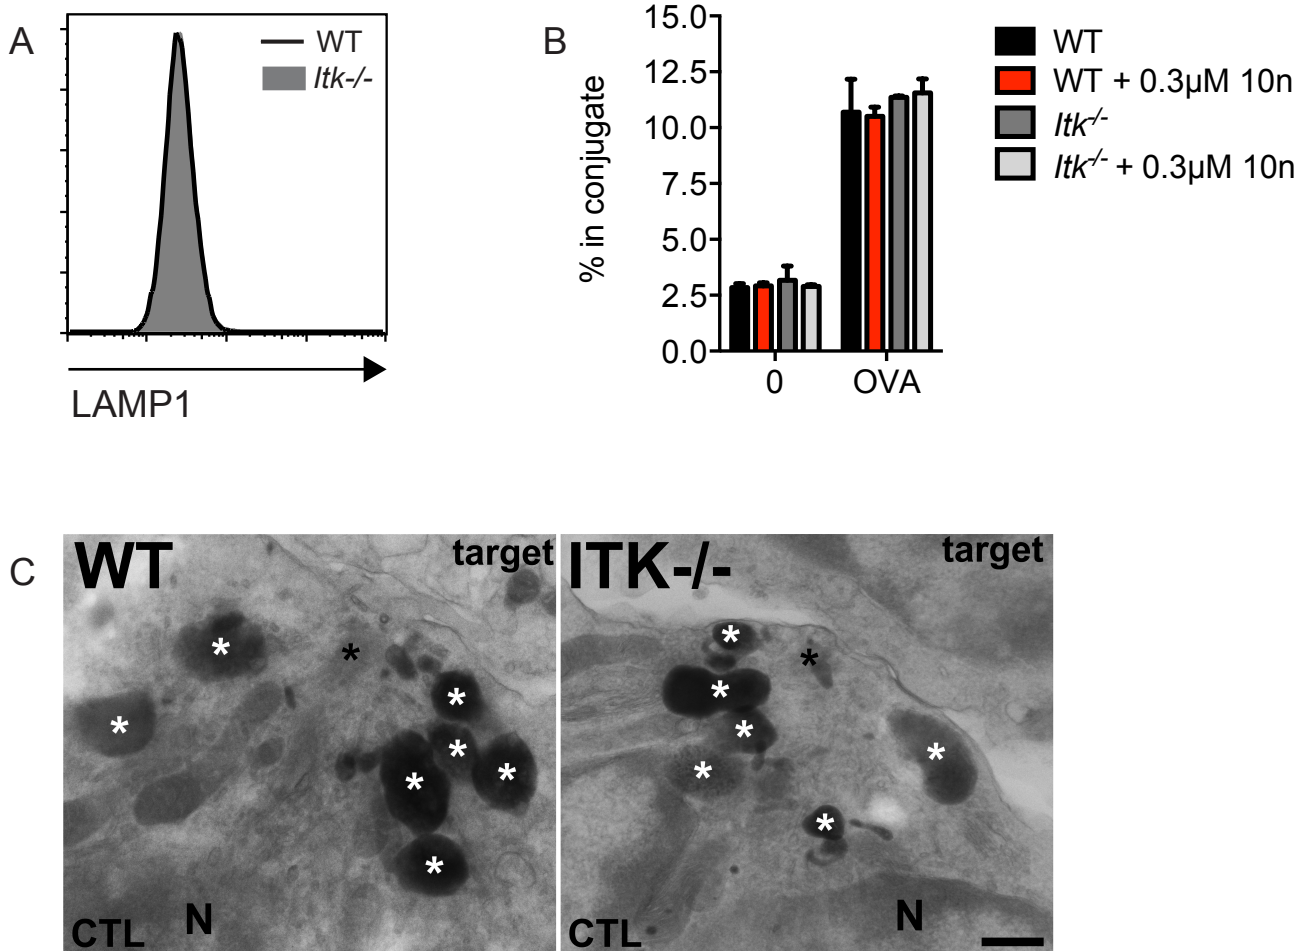

Supplemental figure 3: LAMP1 content and cell adhesion in the absence of ITK activity. (A) Representative histogram of total LAMP1 (CD107a) content in permeabilized WT (black) and *Itk*<sup>-/-</sup> (grey) CTLs from cells used in degranulation assays. (B) Adhesion of previously activated WT OT-I CTLs (black), *Itk*<sup>-/-</sup> OT-I CTLs (grey), or WT or *Itk*<sup>-/-</sup> OT-I CTLs treated with 0.3 μM 10n (red or dark grey, respectively) to EL4 cells pulsed with 1μM OVA peptide or non-pulsed as a control after 20 minutes. Bars represent mean of triplicates ± SD of CD8<sup>+</sup> target<sup>+</sup> cells in the CD8<sup>+</sup> gate, from one of two independent experiments. (C) Semi-thick (200-300 nm) sections showing polarized electron-dense HRP-loaded granules in both WT and ITK-deficient CTLs conjugated to target cells for 60 minutes. Centrosomes = black asterisks. Granules = white asterisks. N=nucleus. Scale bars = 500nm.

## Supplemental figure 4

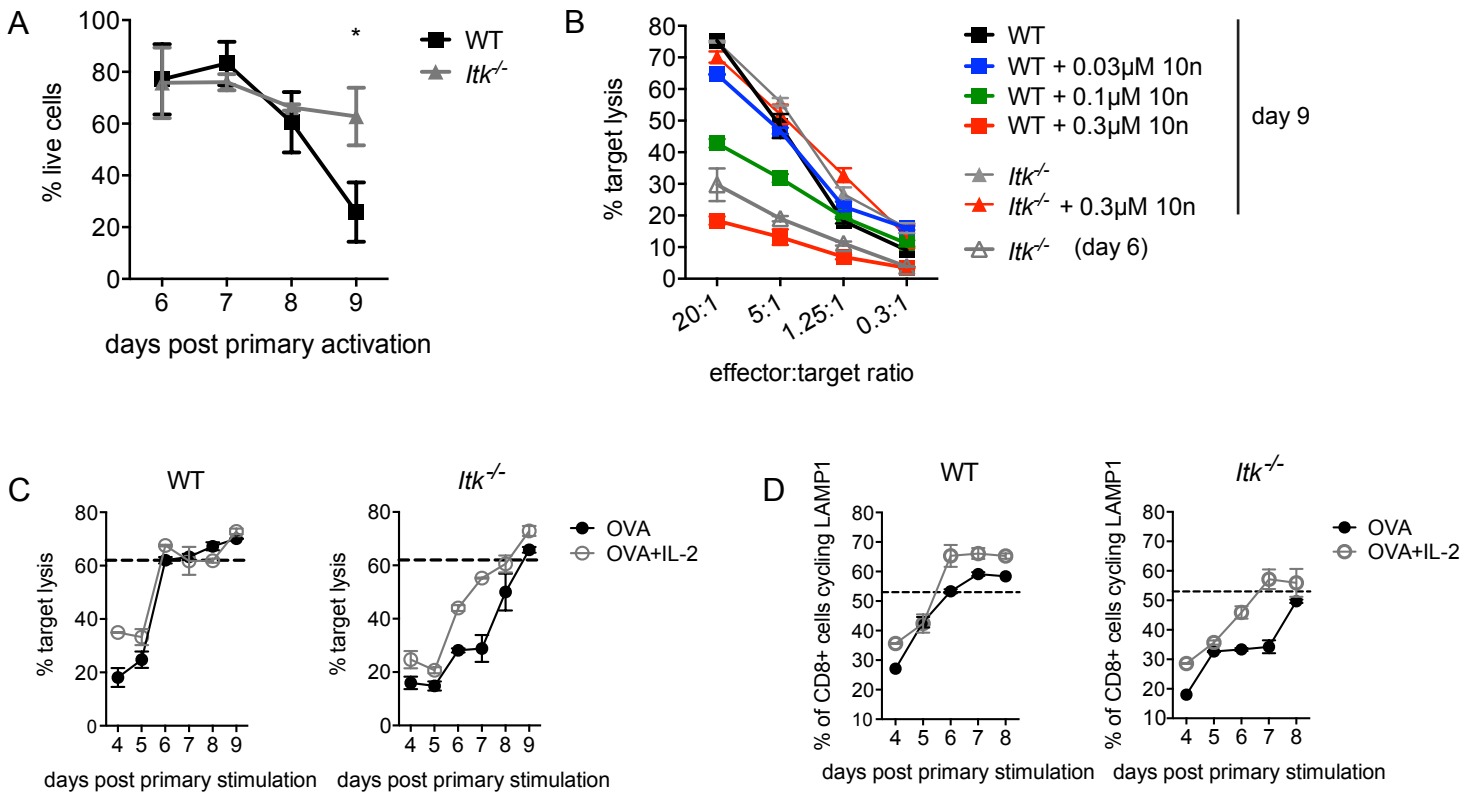

Supplemental figure 4: (A) WT (black) or *Itk*<sup>-/-</sup> OT-I CTLs (grey) were cultured in complete RPMI plus 10% FBS and stained with Live/Dead green dye to evaluate viability. Graph depicts percent of total CD8<sup>+</sup> cells with dye excluded at indicated time points. Points represent mean of triplicates  $\pm$  SD from one of two independent experiments. \* $P < 0.05$ , calculated by Student's T-test. (B) *In vitro* cytotoxicity of EL4 targets pulsed with 1  $\mu$ M OVA peptide by day 9 WT OT-I CTLs treated with indicated concentrations of the ITK inhibitor, 10n (blue, green, and red), immediately before cytotoxicity assays, or left untreated as a control (black), or ITK-deficient OT-I CTLs untreated (grey, closed triangles) or treated with 10n (red, closed triangles). Day 6 *Itk*<sup>-/-</sup> OT-I CTLs are included (grey, open triangles). Graph shows mean of triplicates  $\pm$  SD, and is representative of two independent experiments. (C) *In vitro* cytotoxicity of 1  $\mu$ M OVA peptide-pulsed EL4 target cells by WT (left panel) or *Itk*<sup>-/-</sup> OT-I CTLs (right panel) activated with 10nM OVA peptide only and then cultured in IL-2 for 3 days (OVA, black circles) or 10nM OVA peptide plus 10 IU IL-2 before continued culture in IL-2 for 3 days (OVA+IL-2, grey circles). Graphs show percent cytotoxicity  $\pm$  SD on indicated days post primary stimulation and are representative of two independent experiments. (D) Degranulation measured in a flow-based LAMP1 cycling assay in response to plate-bound anti-CD3 in WT (left panel) or *Itk*<sup>-/-</sup> (right panel) OT-I CTLs activated with 10nM OVA peptide only and then cultured in IL-2 for 3 days (OVA, black circles) or 10nM OVA peptide plus 10 IU IL-2 before continued culture in IL-2 for 3 days (OVA+IL-2, grey circles). Graphs show percent CD8<sup>+</sup> T cells cycling LAMP1  $\pm$  SD, where CD107a-PE positive cells in the CD8<sup>+</sup> gate were determined to be positive for degranulation on indicated days post primary stimulation and are representative of two independent experiments.
